# Supplementary material
Source: Springer Nature journal article supplement (https://www.springermedizin.de/resource/supplementary/12883_2011_507_MOESM1_ESM.pdf/9455286)

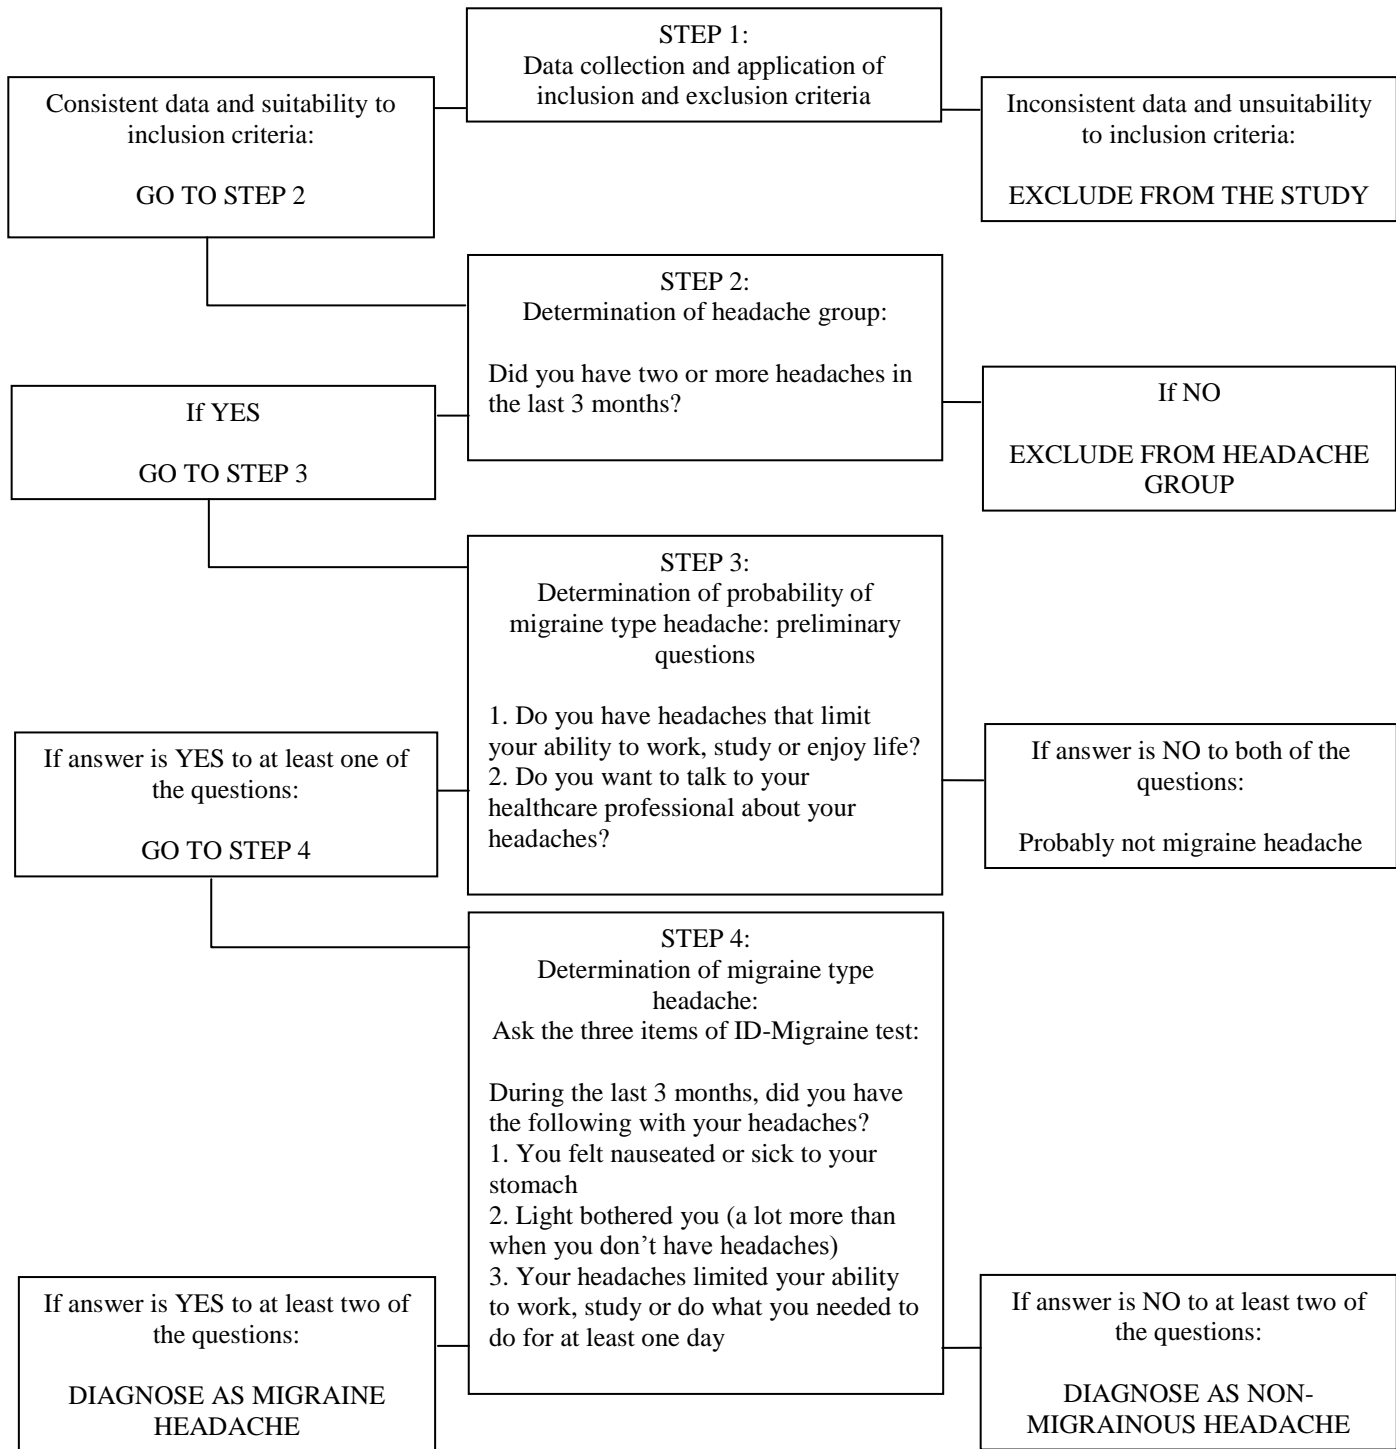

Supplement: MOESM1 [file 9455286]
